# Supplementary material for: Proteome and Ubiquitylome Analyses of Maize Endoplasmic Reticulum under Heat Stress
Source: MDPI journal article supplement (doi:10.3390/genes14030749), 2023-03-19
Supplement: s1 [file s1]

**Table S1. Gene IDs and primers for Real-Time PCR.**

| Gene Name | Gene ID        | Forward                  | Reverse                 |
|-----------|----------------|--------------------------|-------------------------|
| ZmHSP26   | Zm00001d028408 | GAGCACAAGAAGGAGGAGGG     | CCTGCACGTCGATGACCTT     |
| ZmCRT1a   | Zm00001d005460 | AGTCCGAGTGAAAAAGGACG     | AAGTTGTGTCCCCACCGAAT    |
| ZmPDI1    | Zm00001d049099 | AGGCTACCCGACCTTGTACT     | GATGCTCACAGCTCGTCCTT    |
| ZmbZIP60  | Zm00001d046718 | GCAGAGTGCCGTCGCCTCAGCTAC | GGCAGGGTTTCCGTGAGTAC    |
| ZmHsf-01  | Zm00001d027757 | GAGAACCTGGCGCTCAACAT     | CGCCCTTCATCCCTTCGT      |
| ZmHsf-03  | Zm00001d031736 | GAGCAGGTGCTGTCGTC AAG    | TTGTTGCACAGCTTCTTCATCTG |
| ZmHsf-04  | Zm00001d032923 | AGCAGCAAGACAAGAGGAAGGA   | TGTTGCTTTCCCCATCACT     |
| ZmHsf-25  | Zm00001d026094 | GAGGACAACGACGAGGAACAA    | AGCGTCAGCACGTCCAGATC    |
| ZmbZIP17  | Zm00001d007042 | GAAGCATGTATAGGGAGGAGG    | TCTTGAGTGAAGTTCTGTGACG  |
| TUB       | Zm00001d046996 | CTACCTCACGGCATCTGCTATGT  | GTCACACACACTCGACTTCACG  |
